# Supplementary material for: Simulating ice thickness and velocity evolution of Upernavik Isstrøm 1849–2012 by forcing prescribed terminus positions in ISSM
Source: Copernicus journal article supplement (doi:10.5194/tc-12-1511-2018), 2018-04-25
Supplement: Supplementary file 1 [file tc-12-1511-2018-supplement.zip]

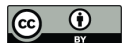

## *Supplement of*

# **Simulating ice thickness and velocity evolution of Upernavik Isstrøm 1849–2012 by forcing prescribed terminus positions in ISSM**

**Konstanze Haubner et al.**

*Correspondence to:* Konstanze Haubner ([khu@geus.dk](mailto:khu@geus.dk))

- [tc-12-1511-2018-supplement-title-page.pdf](#)
- Supplementary
  - [.DS\\_Store](#)
  - [movie01.m4v](#)
  - [movie02.m4v](#)
  - [supplementary\\_figures.pdf](#)

The copyright of individual parts of the supplement might differ from the CC BY 4.0 License.
