# Supplementary material for: Simulating ice thickness and velocity evolution of Upernavik Isstrøm 1849–2012 by forcing prescribed terminus positions in ISSM
Source: Copernicus journal article supplement (doi:10.5194/tc-12-1511-2018), 2018-04-25
Supplement: Supplementary file 3 [file tc-12-1511-2018-supplement.zip]

Archive with 6 entries (5 files):
- Supplementary/
- Supplementary/supplementary_figures.pdf
- Supplementary/movie01.m4v
- Supplementary/.DS_Store
- Supplementary/movie02.m4v
- tc-12-1511-2018-supplement-title-page.pdf
